# Supplementary material for: Exposure of Paracoccidioides brasiliensis to Mebendazole Leads to Inhibition of Fungal Energy Production
Source: Antibiotics (Basel). 2023 Jan 18;12(2):206. doi: 10.3390/antibiotics12020206 (PMC9951877; doi:10.3390/antibiotics12020206)
Supplement: Supplementary file 1 [file antibiotics-12-00206-s001.zip › antibiotics-2158427-supplementary.pdf]

## Article

# Exposure of *Paracoccidioides brasiliensis* to Mebendazole Leads to Inhibition of Fungal Energy Production

Olivia Basso Rocha \*, Kleber Santiago Freitas e Silva, Dayane Moraes, Clayton Luiz Borges, Célia Maria de Almeida Soares and Maristela Pereira

Laboratory of Molecular Biology, Institute of Biological Sciences, Federal University of Goiás, Goiânia 74690-900, Brazil

\* Correspondence: oliviabassorocha@gmail.com; Tel.: +55-62-3521-1110

**Citation:** Rocha, O.B.; e Silva, K.S.F.; Moraes, D.; Borges, C.L.; Soares, C.M.d.A.; Pereira, M. Exposure of *Paracoccidioides brasiliensis* to Mebendazole Leads to Inhibition of Fungal Energy Production. *Antibiotics* **2023**, *12*, 206. <https://doi.org/10.3390/antibiotics12020206>

Academic Editor: Alessia Catalano

Received: 28 December 2022

Revised: 14 January 2023

Accepted: 16 January 2023

Published: 18 January 2023

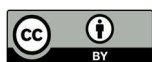

**Copyright:** © 2023 by the authors. Licensee MDPI, Basel, Switzerland. This article is an open access article distributed under the terms and conditions of the Creative Commons Attribution (CC BY) license (<https://creativecommons.org/licenses/by/4.0/>).

**Table S1. *P. brasiliensis* proteins up-regulated after exposure to mebendazole**

| <b>Accession number</b>                                         | <b>Protein description</b>                                            | <b>Fold change</b> |
|-----------------------------------------------------------------|-----------------------------------------------------------------------|--------------------|
| <b>1. Metabolism</b>                                            |                                                                       |                    |
| <b>1.1 Amino acid metabolism</b>                                |                                                                       |                    |
| PADG_05820                                                      | Xaa-Pro aminopeptidase                                                | *                  |
| PADG_05193                                                      | Xaa-Pro aminopeptidase                                                | *                  |
| PADG_00685                                                      | 3-hydroxy-3-methylglutaryl coenzyme A synthase                        | *                  |
| PADG_06671                                                      | 3-isopropylmalate dehydrogenase                                       | *                  |
| PADG_01688                                                      | 4-hydroxy-4-methyl-2-oxoglutarate aldolase/oxaloacetate decarboxylase | *                  |
| PADG_03020                                                      | Alanine--glyoxylate transaminase                                      | *                  |
| PADG_04854                                                      | Anthranilate synthase                                                 | *                  |
| PADG_01404                                                      | Aspartate aminotransferase                                            | *                  |
| PADG_12043                                                      | Cysteine desulfurase                                                  | *                  |
| PADG_02726                                                      | Cysteine synthase                                                     | *                  |
| PADG_08662                                                      | Cystathionine beta-lyase                                              | *                  |
| PADG_07609                                                      | Dihydroxy-acid dehydratase                                            | *                  |
| PADG_01963                                                      | Glycine cleavage system H protein                                     | *                  |
| PADG_01286                                                      | Iso_dh domain-containing protein                                      | *                  |
| PADG_08464                                                      | Maleylacetoacetate isomerase                                          | *                  |
| PADG_08176                                                      | Phosphatidylinositol-phosphatidylcholine                              | *                  |
| <b>1.2 Vitamins, cofactors and prosthetic groups metabolism</b> |                                                                       |                    |
| PADG_00282                                                      | GTP-binding protein ypt2                                              | 1,630245389        |
| PADG_03392                                                      | GTP-binding protein YPT52                                             | *                  |
| PADG_01626                                                      | Ferroxidase                                                           | *                  |
| PADG_03115                                                      | Ran GTPase-binding protein NTF2                                       | *                  |
| <b>1.3 Carbohydrate metabolism</b>                              |                                                                       |                    |
| PADG_03514                                                      | 2-oxoisovalerate dehydrogenase                                        | *                  |
| PADG_03984                                                      | D-fructose-6-phosphate amidotransferase                               | *                  |
| PADG_00262                                                      | Inositol-1-monophosphatase                                            | *                  |
| PADG_03943                                                      | Phosphomannomutase                                                    | *                  |
| <b>1.4 Nucleotide metabolism and cycle cellular</b>             |                                                                       |                    |
| PADG_11958                                                      | U6 snRNA-associated Sm-like protein LSm3                              | *                  |
| PADG_02783                                                      | RNA-binding La domain-containing protein                              | *                  |
| PADG_03459                                                      | RPA_C domain-containing protein                                       | *                  |
| PADG_07689                                                      | RRM domain-containing protein                                         | *                  |
| PADG_01440                                                      | ADP/ATP translocase                                                   | *                  |
| PADG_03669                                                      | DNL-type domain-containing protein                                    | *                  |
| PADG_01455                                                      | KH domain RNA-binding protein                                         | *                  |
| PADG_11421                                                      | Histone H2A                                                           | *                  |
| PADG_11347                                                      | TIA1 cytotoxic granule-associated RNA binding protein                 | *                  |
| PADG_01852                                                      | TPR_REGION domain-containing protein                                  | *                  |
| PADG_02346                                                      | mRNA stability protein                                                | *                  |
| PADG_07515                                                      | Protein phosphatase regulator SHP1                                    | *                  |
| PADG_01243                                                      | Rab GDP dissociation inhibitor                                        | *                  |

|                                                                 |                                                      |             |
|-----------------------------------------------------------------|------------------------------------------------------|-------------|
| PADG_08399                                                      | Ras-like protein Rab-11A                             | *           |
| PADG_03073                                                      | Nuclear movement protein nudC                        | *           |
| <b>1.5 Nitrogen and sulfur metabolism</b>                       |                                                      |             |
| PADG_04420                                                      | Peptide-methionine (S)-S-oxide reductase             | *           |
| <b>1.6 Lipid, fatty acid and isoprenoid metabolism</b>          |                                                      |             |
| PADG_00546                                                      | 3-oxoacyl-[acyl-carrier protein] reductase           | *           |
| PADG_00254                                                      | 3-oxoacyl-[acyl-carrier-protein] reductase           | *           |
| PADG_04774                                                      | Dodecenoyl-CoA isomerase                             | *           |
| PADG_08018                                                      | Glycerol-3-phosphate dehydrogenase                   | *           |
| <b>2. Energy</b>                                                |                                                      |             |
| <b>2.1 Glycolysis and gluconeogenesis</b>                       |                                                      |             |
| PADG_03099                                                      | Aldedh domain-containing protein                     | *           |
| PADG_07950                                                      | Phosphotransferase                                   | *           |
| <b>2.2 Pentose-phosphate pathway</b>                            |                                                      |             |
| PADG_03099                                                      | Aldedh domain-containing protein                     | *           |
| <b>2.3 Tricarboxylic-acid pathway</b>                           |                                                      |             |
| PADG_08013                                                      | Succinate dehydrogenase                              | *           |
| PADG_01762                                                      | Oxoglutarate dehydrogenase                           | *           |
| <b>2.4 Electron transport chain</b>                             |                                                      |             |
| PADG_03785                                                      | ATP phosphoribosyltransferase PADG_03785             | *           |
| PADG_00688                                                      | F-type H <sup>+</sup> -transporting ATPase subunit H | 1,024313448 |
| PADG_05739                                                      | NAP family protein                                   | *           |
| <b>3. Protein metabolism</b>                                    |                                                      |             |
| PADG_07190                                                      | Proteasome core particle subunit alpha 2             | *           |
| PADG_03965                                                      | Proteasome subunit beta                              | *           |
| PADG_06290                                                      | Proteasome alpha 1 domain-containing protein         | *           |
| PADG_05160                                                      | Dipeptidyl peptidase 3                               | *           |
| <b>4. Protein with binding function or cofactor requirement</b> |                                                      |             |
| PADG_00282                                                      | GTP-binding protein ypt2                             | 1,630245389 |
| PADG_03392                                                      | GTP-binding protein YPT52                            | *           |
| PADG_01626                                                      | Ferroxidase                                          | *           |
| PADG_03115                                                      | Ran GTPase-binding protein NTF2                      | *           |
| <b>5. Cell rescue, defense and virulence</b>                    |                                                      |             |
| PADG_07264                                                      | Stress-response A/B barrel domain-containing protein | *           |
| PADG_00454                                                      | Rhodanese domain-containing protein                  | *           |
| <b>6. Ribosomal metabolism</b>                                  |                                                      |             |
| PADG_07583                                                      | 40S ribosomal protein S21                            | *           |
| PADG_01914                                                      | 60S ribosomal protein L35                            | *           |
| PADG_04612                                                      | Ribonucleoprotein                                    | *           |
| PADG_03214                                                      | Small nuclear ribonucleoprotein                      | *           |
| PADG_01281                                                      | Mitochondrial 37S ribosomal protein MRPS8            | *           |
| PADG_04731                                                      | KOW domain-containing protein                        | *           |
| <b>7. Translation</b>                                           |                                                      |             |
| PADG_05900                                                      | Transcription elongation factor 1                    | *           |
| PADG_08033                                                      | Eukaryotic translation initiation                    | *           |
| PADG_04210                                                      | eIF2B_5 domain-containing protein                    | *           |

|                                |                             |             |
|--------------------------------|-----------------------------|-------------|
| PADG_00878                     | Isoleucyl-tRNA synthetase   | *           |
| PADG_06249                     | Glutamine--tRNA ligase      | *           |
| PADG_04083                     | Protein-synthesizing GTPase | *           |
| <b>8. Unclassified protein</b> |                             |             |
| PADG_00465                     | Uncharacterized protein     | *           |
| PADG_01380                     | Uncharacterized protein     | *           |
| PADG_02114                     | Uncharacterized protein     | *           |
| PADG_04934                     | Uncharacterized protein     | *           |
| PADG_07506                     | Uncharacterized protein     | 1,038740471 |
| PADG_07865                     | Uncharacterized protein     | *           |
| PADG_11424                     | Uncharacterized protein     | *           |
| PADG_01867                     | Uncharacterized protein     | *           |
| PADG_11111                     | Uncharacterized protein     | *           |

Table S2. *P. brasiliensis* proteins down-regulated after exposure to mebendazole

| Accession number                 | Protein description                                                     | Fold change |
|----------------------------------|-------------------------------------------------------------------------|-------------|
| <b>1. Metabolism</b>             |                                                                         |             |
| <b>1.1 Amino acid metabolism</b> |                                                                         |             |
| PADG_00255                       | 3-hydroxyacyl-[acyl-carrier-protein] dehydratase                        | -0,38953    |
| PADG_03466                       | 3-hydroxyisobutyrate dehydrogenase                                      | -0,27411    |
| PADG_06876                       | 3-hydroxyisobutyryl-CoA hydrolase                                       | -0,24526    |
| PADG_08468                       | 4-hydroxyphenylpyruvate dioxygenase                                     | 0,057708    |
| PADG_08328                       | 5-methyltetrahydropteroyltriglutamate--homocysteine S-methyltransferase | -0,08656    |
| PADG_04374                       | UTP--glucose-1-phosphate uridylyltransferase                            | -0,17312    |
| PADG_05492                       | Serine 3-dehydrogenase                                                  | -0,23083    |
| PADG_05111                       | Serine hydroxymethyltransferase                                         | -0,14427    |
| PADG_05277                       | Serine hydroxymethyltransferase                                         | -0,33182    |
| PADG_00443                       | 6-hydroxymethyl-7_8-dihydropterin pyrophosphokinase                     | -0,10099    |
| PADG_01886                       | Adenosylhomocysteinase                                                  | -0,23083    |
| PADG_00002                       | Alanine ligase                                                          | 0,014427    |
| PADG_08262                       | Asparagine synthase                                                     | -0,18755    |
| PADG_01621                       | Aspartate aminotransferase                                              | -0,18755    |
| PADG_03686                       | Aspartate aminotransferase                                              | 0,043281    |
| PADG_04962                       | Aspartate--tRNA ligase                                                  | -0,31739    |
| PADG_01615                       | Homocitrate synthase                                                    | -0,47609    |
| PADG_00663                       | Homoserine dehydrogenase                                                | -0,23083    |
| PADG_04522                       | Homoserine kinase                                                       | -0,43281    |
| PADG_02719                       | Methionine adenosyltransferase 2 subunit beta                           | -0,54822    |
| PADG_02914                       | Aminomethyltransferase                                                  | -0,12984    |
| PADG_03149                       | Aminopeptidase                                                          | -0,2164     |
| PADG_00215                       | Aromatic-L-amino-acid decarboxylase                                     | -0,04328    |
| PADG_04570                       | Branched-chain-amino-acid aminotransferase                              | -0,07213    |
| PADG_03627                       | 2-oxoisovalerate dehydrogenase                                          | -0,28854    |
| PADG_04603                       | Spermidine synthase                                                     | -0,07213    |
| PADG_03522                       | S-methyl-5'-thioadenosine phosphorylase                                 | -0,23083    |

|            |                                                  |          |
|------------|--------------------------------------------------|----------|
| PADG_01928 | S-adenosylmethionine synthase                    | -0,17312 |
| PADG_06314 | Carboxypeptidase                                 | *        |
| PADG_05058 | Chorismate mutase                                | *        |
| PADG_00888 | Citrulline-aspartate ligase                      | -0,02885 |
| PADG_02456 | Cystathionine gamma-lyase CYS3                   | *        |
| PADG_01418 | Cysteine dioxygenase                             | -0,62036 |
| PADG_06494 | Dihydrolipoyl dehydrogenase                      | -0,1587  |
| PADG_05904 | Dihydrolipoyllysine-residue succinyltransferase  | -0,12984 |
| PADG_04142 | FAA_hydrolase domain-containing protein          | *        |
| PADG_08465 | Fumarylacetoacetase                              | -0,11542 |
| PADG_06319 | Glutamate decarboxylase                          | *        |
| PADG_04516 | Glutamate dehydrogenase                          | 0,014427 |
| PADG_05337 | Glutamate-5-semialdehyde dehydrogenase           | *0       |
| PADG_00210 | Glycine cleavage system P protein                | -0,33182 |
| PADG_07369 | Isovaleryl-CoA dehydrogenase                     | -0,69249 |
| PADG_06429 | Ketol-acid reductoisomerase                      | -0,18755 |
| PADG_08472 | Lysine                                           | -0,40395 |
| PADG_05922 | M20_dimer domain-containing protein              | -0,12984 |
| PADG_07370 | Methylcrotonoyl-CoA carboxylase                  | 0        |
| PADG_05085 | Multifunctional fusion protein                   | -0,14427 |
| PADG_08406 | O-acetylhomoserine (Thiol)-lyase                 | -0,17312 |
| PADG_00386 | Phospho-2-dehydro-3-deoxyheptonate aldolase      | -0,18755 |
| PADG_02123 | Aflatoxin B1 aldehyde reductase                  | *        |
| PADG_07606 | D-xylose reductase                               | 0,057708 |
| PADG_01486 | Short chain dehydrogenase/reductase family       | -0,05771 |
| PADG_06546 | Aminopeptidase                                   | 0,201977 |
| PADG_02214 | 4-aminobutyrate aminotransferase                 | 0,115416 |
| PADG_08468 | 4-hydroxyphenylpyruvate dioxygenase              | 0,057708 |
| PADG_02751 | Acetyl-CoA C-acetyltransferase                   | 0,086562 |
| PADG_00637 | Arginase                                         | 0,072135 |
| PADG_11833 | CN hydrolase domain-containing protein           | 0,360674 |
| PADG_07782 | Deoxyuridine 5'-triphosphate nucleotidohydrolase | 0,173123 |
| PADG_06490 | Formamidase                                      | 0,18755  |
| PADG_08466 | Homogentisate 1_2-dioxygenase                    | 0,201977 |
| PADG_02847 | HpcH_HpaI domain-containing protein              | 0,173123 |
| PADG_01328 | Ornithine aminotransferase                       | 0,230831 |
| PADG_04657 | Nascent polypeptide-associated                   | 0,346247 |
| PADG_00405 | Choline dehydrogenase                            | -0,85119 |

## 1.2 Vitamins, cofactors and prosthetic groups metabolism

|            |                                        |          |
|------------|----------------------------------------|----------|
| PADG_04810 | GTP-binding nuclear protein            | -0,2164  |
| PADG_08337 | GTP-binding protein rhoA               |          |
| PADG_08342 | GTP-binding protein ypt1               | -0,10099 |
| PADG_01530 | Guanine nucleotide-binding protein     | -0,01443 |
| PADG_01032 | Aminoacylproline aminopeptidase        | *        |
| PADG_03431 | tRNA-binding domain-containing protein | -0,11542 |
| PADG_11950 | RanBD1 domain-containing protein       | 0,274112 |

|                                                     |                                                                 |          |
|-----------------------------------------------------|-----------------------------------------------------------------|----------|
| PADG_05822                                          | Pyridoxal 5'-phosphate synthase                                 | -0,12984 |
| PADG_07081                                          | Probable electron transfer flavoprotein subunit alpha           | 0,028854 |
| PADG_06488                                          | PPIase cyclophilin-type domain-containing protein               | -0,17312 |
| PADG_04250                                          | Formyltetrahydrofolate synthetase                               | -0,34625 |
| PADG_00824                                          | HABP4_PAI-RBP1 domain-containing protein                        | -0,43281 |
| PADG_07749                                          | NAD(P)H:quinone oxidoreductase_type IV                          | -0,10099 |
| PADG_05947                                          | Nicotinate-nucleotide pyrophosphorylase                         | -0,08656 |
| PADG_03176                                          | Phosphatidylglycerol/phosphatidylinositol transfer              | -1,15416 |
| PADG_07508                                          | Phosphatidylinositol transfer protein                           | -0,60593 |
| <b>1.3 Carbohydrate metabolism</b>                  |                                                                 |          |
| PADG_04718                                          | 2-methylcitrate dehydratase                                     | -0,05771 |
| PADG_07699                                          | S-formylglutathione hydrolase                                   | 0,490516 |
| PADG_07606                                          | D-xylose reductase                                              | 0,057708 |
| PADG_01372                                          | Mannitol-1-phosphate 5-dehydrogenase                            | 0,201977 |
| PADG_07435                                          | Sorbose reductase                                               | -0,11542 |
| <b>1.4 Nucleotide metabolism and cycle cellular</b> |                                                                 |          |
| PADG_04099                                          | 5-aminoimidazole-4-carboxamide ribonucleotide formyltransferase | -0,04328 |
| PADG_02683                                          | UV excision repair protein                                      | -0,11542 |
| PADG_02484                                          | Valyl-tRNA synthetase                                           |          |
| PADG_03424                                          | UBA_e1_C domain-containing protein                              | 0,201977 |
| PADG_04242                                          | Sulphydryl oxidase                                              | 0,562651 |
| PADG_00422                                          | RRM domain-containing protein                                   | 0,129843 |
| PADG_05893                                          | Histone chaperone NAP1                                          | -0,12984 |
| PADG_05907                                          | Histone H2B                                                     | 0,346247 |
| PADG_06768                                          | Histone-glutamine methyltransferase                             | 0,072135 |
| PADG_05906                                          | Histone H2A                                                     | -0,2164  |
| PADG_02246                                          | Adenosine kinase                                                | 0,360674 |
| PADG_00832                                          | Adenylosuccinate synthetase                                     | 0,562651 |
| PADG_00873                                          | Histone H3                                                      | -0,07213 |
| PADG_00872                                          | Histone H4                                                      | 0        |
| PADG_07134                                          | Histone H4                                                      | -0,04328 |
| PADG_01565                                          | Calnexin                                                        |          |
| PADG_02899                                          | U2 snRNP complex subunit CUS2                                   |          |
| PADG_00144                                          | U6 snRNA-associated Sm-like protein LSm2                        |          |
| PADG_05897                                          | Seryl-tRNA synthetase                                           |          |
| PADG_00001                                          | Peptidyl-prolyl cis-trans isomerase                             | 0,057708 |
| PADG_02555                                          | Nucleic acid-binding protein                                    | 0,100989 |
| PADG_01711                                          | Hsp90 co-chaperone AHA1                                         | 0,18755  |
| PADG_04866                                          | S10_plectin domain-containing protein                           | -0,18755 |
| PADG_05034                                          | RRM domain-containing protein                                   | -0,14427 |
| PADG_11711                                          | RNA helicase                                                    | -0,41838 |
| PADG_01151                                          | RNA_pol_L_2 domain-containing protein                           |          |
| PADG_08724                                          | RPEL repeat protein                                             | -0,04328 |
| PADG_04912                                          | Perodoxin                                                       |          |
| PADG_03841                                          | Protein disulfide-isomerase                                     | -0,04328 |
| PADG_04034                                          | Chaperone Dna                                                   | -0,10099 |

|                                                        |                                                     |          |
|--------------------------------------------------------|-----------------------------------------------------|----------|
| PADG_07023                                             | Carn_acyltransf domain-containing protein           | -0,28854 |
| PADG_08048                                             | CCT-beta                                            | -0,80791 |
| PADG_05683                                             | Cell division control protein                       | -0,36067 |
| PADG_05139                                             | Chaperone protein dnaK                              | -0,02885 |
| PADG_02763                                             | Cyclin-dependent kinases regulatory                 | -0,17312 |
| PADG_05848                                             | Diadenosine tetraphosphate synthetase               | -0,50494 |
| PADG_02845                                             | Diploid state maintenance protein chpA              | 0,043281 |
| PADG_05837                                             | E3 ubiquitin ligase complex SCF subunit             | -0,05771 |
| PADG_03562                                             | Endoplasmic reticulum chaperone                     | -0,02885 |
| PADG_02652                                             | Grp1p                                               | -0,05771 |
| PADG_06992                                             | GrpE protein homolog                                | 0,014427 |
| PADG_05183                                             | Grx4 family monothiol glutaredoxin                  | -1,54368 |
| PADG_07585                                             | Inosine-5'-monophosphate dehydrogenase              | -0,1587  |
| PADG_00207                                             | J domain-containing protein                         | -0,1587  |
| PADG_04899                                             | Lactamase                                           |          |
| PADG_04288                                             | L-PSP endoribonuclease family protein (Hmf1)        | -0,24526 |
| PADG_11857                                             | Mitotic checkpoint protein BUB3                     |          |
| PADG_00656                                             | Non-histone chromosomal protein 6                   | -0,2164  |
| PADG_00849                                             | Nuclear segregation protein Bfr1                    | -0,66364 |
| PADG_07524                                             | Nucleoside diphosphate kinase                       | -0,08656 |
| PADG_02183                                             | Nudix hydrolase domain-containing protein           |          |
| PADG_05474                                             | Nudix hydrolase domain-containing protein           |          |
| PADG_05225                                             | Orotidine 5'-phosphate decarboxylase                | -0,89447 |
| PADG_00111                                             | Oxidative DNA demethylase                           | -0,47609 |
| <b>1.5 Nitrogen and sulfur metabolism</b>              |                                                     |          |
|                                                        | Urease PADG_07010                                   | -0,3751  |
|                                                        | Uricase PADG_00331                                  | -0,14427 |
|                                                        | Carbonic anhydrase PADG_07674                       |          |
|                                                        | Nitroreductase domain-containing protein PADG_02048 | -0,17312 |
| <b>1.6 Lipid, fatty acid and isoprenoid metabolism</b> |                                                     |          |
| PADG_03194                                             | 3-ketoacyl-CoA thiolase B                           | -0,25969 |
| PADG_01687                                             | 3-ketoacyl-coA thiolase                             | -0,23083 |
| PADG_06805                                             | Acyl-CoA dehydrogenase                              | -0,02885 |
| PADG_01209                                             | Enoyl-CoA hydratase                                 | -0,11542 |
| PADG_12025                                             | Glutaryl-CoA dehydrogenase                          | 0        |
| PADG_06382                                             | Acetyl-CoA acetyltransferase                        | -0,08656 |
| PADG_04687                                             | 3-beta-hydroxysteroid dehydrogenase                 | 0,158696 |
| PADG_01564                                             | Methylmalonate-semialdehyde dehydrogenase           | -0,1587  |
| <b>1.7 Secondary metabolism</b>                        |                                                     |          |
| PADG_04636                                             | DLH domain-containing protein                       | -0,11542 |
| <b>2. Energy</b>                                       |                                                     |          |
| <b>2. 1 Glycolysis and gluconeogenesis</b>             |                                                     |          |
| PADG_04059                                             | Enolase                                             | -0,11542 |
| PADG_07213                                             | Acetyltransferase                                   | -0,04328 |
| PADG_03403                                             | Aldedhyde dehydrogenase domain-containing protein   | -0,17312 |
| PADG_06740                                             | Aldedhyde dehydrogenase domain-containing protein   | -0,08656 |

|                                       |                                                   |          |
|---------------------------------------|---------------------------------------------------|----------|
| PADG_05081                            | Aldehyde dehydrogenase                            | 0,057708 |
| PADG_02411                            | Glyceraldehyde-3-phosphate dehydrogenase          | -0,01443 |
| PADG_01706                            | Fructose-bisphosphatase                           | -0,2164  |
| PADG_00668                            | Fructose-bisphosphate aldolase                    | -0,23083 |
| PADG_04103                            | Pyruvate carboxylase                              | -0,31739 |
| PADG_07907                            | Pyruvate decarboxylase                            | -0,27411 |
| PADG_00714                            | Pyruvate decarboxylase                            | -0,04328 |
| PADG_02063                            | Pyruvate dehydrogenase E1 component alpha subunit | -0,18755 |
| PADG_00246                            | Pyruvate dehydrogenase E1 component subunit beta  | -0,07213 |
| PADG_01278                            | Pyruvate kinase                                   | -0,14427 |
| PADG_02145                            | Alpha-1_4 glucan phosphorylase                    | -0,04328 |
| PADG_03276                            | S-(hydroxymethyl)glutathione dehydrogenase        | 0        |
| PADG_00451                            | Glucose-6-phosphate isomerase                     | -0,01443 |
| PADG_11132                            | Phosphoglucomutase                                | -0,04328 |
| PADG_01896                            | Phosphoglycerate kinase                           | -0,05771 |
| PADG_05109                            | Phosphoglycerate mutase                           | -0,11542 |
| PADG_05081                            | Aldehyde dehydrogenase                            | 0,057708 |
| PADG_06906                            | Triosephosphate isomerase                         | 0,158696 |
| PADG_03118                            | Glucose-6-phosphate 1-epimerase                   | 0,129843 |
| PADG_02981                            | DJ-1_PfpI domain-containing protein               | -0,20198 |
| <b>2.2 Pentose-phosphate pathway</b>  |                                                   |          |
| PADG_06054                            | 2-deoxy-D-ribose 5-phosphate aldolase             |          |
| PADG_03651                            | 6-phosphogluconate dehydrogenase_ decarboxylating | -0,23083 |
| PADG_04604                            | Transketolase                                     | 0,043281 |
| PADG_07420                            | Transaldolase                                     | -0,02885 |
| PADG_03859                            | Chlorophyll synthesis pathway protein             | -0,17312 |
| <b>2.3 Tricarboxylic-acid pathway</b> |                                                   |          |
| PADG_11845                            | Aconitate hydratase                               | 0        |
| PADG_04993                            | ATP citrate synthase                              | -0,28854 |
| PADG_04994                            | ATP citrate synthase                              | -0,79348 |
| PADG_02561                            | ATP synthase subunit alpha                        | -0,2164  |
| PADG_04729                            | ATP synthase subunit d_ mitochondrial             | -0,14427 |
| PADG_07813                            | ATP synthase subunit gamma                        | -0,41838 |
| PADG_07210                            | Malate dehydrogenase                              | -0,04328 |
| PADG_08054                            | Malate dehydrogenase                              | -0,10099 |
| PADG_04702                            | Malate synthase                                   | -0,38953 |
| PADG_00052                            | Succinate dehydrogenase                           | -0,80791 |
| PADG_00317                            | Succinate--CoA ligase                             |          |
| PADG_02260                            | Succinate--CoA ligase                             | 0,043281 |
| PADG_03058                            | Succinate-semialdehyde dehydrogenase              | -0,54822 |
| PADG_04939                            | Succinyl-CoA                                      | -0,12984 |
| PADG_02728                            | Sulfite oxidase                                   | -0,12984 |
| PADG_04710                            | Citrate synthase                                  | -0,12984 |
| PADG_08387                            | Citrate synthase                                  | 0,028854 |
| PADG_06221                            | Formate dehydrogenase                             | -0,64921 |
| PADG_08119                            | Fumarate hydratase                                | -0,02885 |

|                                                                 |                                                       |          |
|-----------------------------------------------------------------|-------------------------------------------------------|----------|
| PADG_02805                                                      | Isocitrate dehydrogenase [NAD] subunit_mitochondrial  | -0,46166 |
| PADG_03977                                                      | Isocitrate dehydrogenase [NAD] subunit_mitochondrial  | -0,34625 |
| PADG_04249                                                      | Isocitrate dehydrogenase                              | -0,1587  |
| PADG_01483                                                      | Isocitrate lyase                                      | -0,04328 |
| PADG_00171                                                      | L-lactate dehydrogenase (cytochrome)                  | -0,11542 |
| PADG_08503                                                      | Phosphoenolpyruvate carboxykinase                     | -0,18755 |
| <b>2.4 Electron transport chain</b>                             |                                                       |          |
| PADG_06956                                                      | Vacuolar proton pump                                  |          |
| PADG_02592                                                      | Cytochrome b5                                         | -0,01443 |
| PADG_04559                                                      | Cytochrome b5                                         | -0,23083 |
| PADG_06978                                                      | Cytochrome c                                          |          |
| PADG_05750                                                      | Cytochrome c oxidase                                  | -0,24526 |
| PADG_08349                                                      | ATP synthase subunit beta                             | 0,072135 |
| PADG_00192                                                      | ATP-dependent 6-phosphofructokinase                   | 0,375101 |
| PADG_07964                                                      | H(+)-transporting V1 sector ATPase                    | -0,7502  |
| PADG_04175                                                      | Inorganic diphosphatase                               | -0,01443 |
| PADG_06196                                                      | Oxidored_FMN domain-containing protein                | -0,02885 |
| PADG_00366                                                      | NAD(P)-bd_dom domain-containing protein               | 0,504943 |
| PADG_05523                                                      | PKS_ER domain-containing protein                      | -0,23083 |
| PADG_07836                                                      | PKS_ER domain-containing protein                      | -0,04328 |
| <b>2.5 Fermentation</b>                                         |                                                       |          |
| PADG_11405                                                      | Alcohol dehydrogenase                                 | -0,44724 |
| <b>3. Protein metabolism</b>                                    |                                                       |          |
| PADG_07190                                                      | Proteasome core particle subunit alpha 2              |          |
| PADG_02735                                                      | Proteasome subunit alpha type                         | 0,259685 |
| PADG_03965                                                      | Proteasome subunit beta                               |          |
| PADG_02735                                                      | Proteasome subunit alpha type                         | 0,259685 |
| PADG_06290                                                      | Proteasome alpha_domain-containing protein            |          |
| PADG_05160                                                      | Dipeptidyl peptidase                                  |          |
| <b>4. Protein with binding function or cofactor requirement</b> |                                                       |          |
| PADG_04810                                                      | GTP-binding nuclear protein                           | -0,2164  |
| PADG_08337                                                      | GTP-binding protein rhoA                              |          |
| PADG_08342                                                      | GTP-binding protein ypt1                              | -0,10099 |
| PADG_01530                                                      | Guanine nucleotide-binding protein                    | -0,01443 |
| PADG_01032                                                      | Aminoacylproline aminopeptidase                       |          |
| PADG_03431                                                      | tRNA-binding domain-containing protein                | -0,11542 |
| PADG_05822                                                      | Pyridoxal 5'-phosphate synthase                       | -0,12984 |
| PADG_07081                                                      | Probable electron transfer flavoprotein subunit alpha | 0,028854 |
| PADG_06488                                                      | PPIase cyclophilin-type domain-containing protein     | -0,17312 |
| PADG_04250                                                      | Formyltetrahydrofolate synthetase                     | -0,34625 |
| PADG_00824                                                      | HABP4_PA1-RBP1 domain-containing protein              | -0,43281 |
| PADG_07749                                                      | NAD(P)H:quinone oxidoreductase_type IV                | -0,10099 |
| PADG_11950                                                      | RanBD1 domain-containing protein                      | 0,274112 |
| PADG_05947                                                      | Nicotinate-nucleotide pyrophosphorylase               | -0,08656 |
| PADG_03176                                                      | Phosphatidylglycerol/phosphatidylinositol transfer    | -1,15416 |
| PADG_07508                                                      | Phosphatidylinositol transfer protein                 | -0,60593 |

**5. Cell rescue, defense and virulence**

|            |                                           |          |
|------------|-------------------------------------------|----------|
| PADG_08369 | Hsp60-like protein                        | -0,17312 |
| PADG_08118 | Hsp72-like protein                        | -0,04328 |
| PADG_02761 | Hsp75-like protein                        | -0,01443 |
| PADG_00430 | Hsp7-like protein                         | -0,12984 |
| PADG_02030 | Hsp90 chaperone protein kinase            | -0,11542 |
| PADG_04379 | Hsp90 cochaperone STI1                    | -0,08656 |
| PADG_07715 | Hsp90-like protein                        | -0,23083 |
| PADG_02785 | Heat shock protein Hsp88                  | -0,05771 |
| PADG_01363 | ACB domain-containing protein             | -0,07213 |
| PADG_07627 | 4-carboxymuconolactone decarboxylase      | 0        |
| PADG_05032 | Hsp90 cochaperone SBA1                    | -0,30297 |
| PADG_01755 | Superoxide dismutase                      | -0,2164  |
| PADG_07418 | Superoxide dismutase                      | -0,11542 |
| PADG_03095 | Thioredoxin domain-containing protein     | 0,028854 |
| PADG_07946 | Thioredoxin domain-containing protein     | -0,18755 |
| PADG_05504 | Thioredoxin                               | -0,07213 |
| PADG_01551 | Thioredoxin reductase                     | -0,17312 |
| PADG_03163 | Peroxidase                                | -0,01443 |
| PADG_03963 | 30 kDa heat shock protein                 | 0,115416 |
| PADG_00446 | Oxidoreductase 2-nitropropane dioxygenase | -0,18755 |

**6. Ribosomal metabolism**

|            |                                 |          |
|------------|---------------------------------|----------|
| PADG_00044 | Ribonucleo protein              | -0,34625 |
| PADG_01407 | 40S ribosomal protein           | -0,27411 |
| PADG_07685 | 40S ribosomal protein           | 0,028854 |
| PADG_06525 | 40S ribosomal protein S1        | -0,33182 |
| PADG_01267 | 40S ribosomal protein S11       | -0,14427 |
| PADG_01427 | 40S ribosomal protein S12       | -0,04328 |
| PADG_00335 | 40S ribosomal protein S14       | -0,24526 |
| PADG_00354 | 40S ribosomal protein S17       | 0        |
| PADG_06313 | 40S ribosomal protein S18       | -0,1587  |
| PADG_12324 | 40S ribosomal protein S19       | -0,3751  |
| PADG_08602 | 40S ribosomal protein S2        | -0,12984 |
| PADG_06502 | 40S ribosomal protein S20       | -0,23083 |
| PADG_04315 | 40S ribosomal protein S24       | -0,43281 |
| PADG_06599 | 40S ribosomal protein S25       |          |
| PADG_08238 | 40S ribosomal protein S26       | -0,24526 |
| PADG_06048 | 40S ribosomal protein S27       | -0,23083 |
| PADG_08605 | 40S ribosomal protein S28       | -0,14427 |
| PADG_03315 | 40S ribosomal protein S4        | -0,10099 |
| PADG_06838 | 40S ribosomal protein S5        | -0,25969 |
| PADG_01654 | 40S ribosomal protein S6        | 0,043281 |
| PADG_00942 | 40S ribosomal protein S7        | -0,30297 |
| PADG_03326 | 40S ribosomal protein S9        | -0,01443 |
| PADG_02446 | 60S acidic ribosomal protein P2 | -0,3751  |
| PADG_04030 | 60S acidic ribosomal protein    | -0,57708 |

|            |                                           |          |
|------------|-------------------------------------------|----------|
| PADG_08244 | 60S acidic ribosomal protein              | -0,24526 |
| PADG_00612 | 60S ribosomal protein                     | -0,24526 |
| PADG_04106 | 60S ribosomal protein L11                 | -0,10099 |
| PADG_07803 | 60S ribosomal protein L12                 | -0,40395 |
| PADG_11227 | 60S ribosomal protein L13                 | -0,25969 |
| PADG_05338 | 60S ribosomal protein L18-B               | -0,18755 |
| PADG_02249 | 60S ribosomal protein L2                  | -0,18755 |
| PADG_03873 | 60S ribosomal protein L20                 | -0,18755 |
| PADG_03325 | 60S ribosomal protein L21                 | -0,27411 |
| PADG_04449 | 60S ribosomal protein L23                 | -0,38953 |
| PADG_05883 | 60S ribosomal protein L25                 | 0,014427 |
| PADG_12253 | 60S ribosomal protein L3                  | -0,23083 |
| PADG_11832 | 60S ribosomal protein L31                 | -0,40395 |
| PADG_01083 | 60S ribosomal protein L32                 |          |
| PADG_04402 | 60S ribosomal protein L34                 | -0,23083 |
| PADG_04065 | 60S ribosomal protein L36                 | -0,11542 |
| PADG_05836 | 60S ribosomal protein L39                 | -0,12984 |
| PADG_01026 | 60S ribosomal protein L43                 | -0,01443 |
| PADG_05244 | 60S ribosomal protein L44                 | -0,1587  |
| PADG_11379 | 60S ribosomal protein L5                  | -0,28854 |
| PADG_02888 | 60S ribosomal protein L6                  | -0,20198 |
| PADG_01387 | 60S ribosomal protein L7                  | -0,18755 |
| PADG_04848 | 60S ribosomal protein L8                  | -0,24526 |
| PADG_05025 | Ribosomal protein L24                     | -0,1587  |
| PADG_02056 | Ribosomal protein L7/L12                  | -0,24526 |
| PADG_02828 | Ribosomal protein                         | -0,34625 |
| PADG_08715 | Ribosomal_L28e domain-containing protein  | -0,07213 |
| PADG_02445 | 40S ribosomal protein                     | 0,346247 |
| PADG_00784 | 40S ribosomal protein S0                  | 0,706921 |
| PADG_00333 | 40S ribosomal protein S16                 | 0,100989 |
| PADG_07870 | Ribosomal_S7 domain-containing protein    | -0,04328 |
| PADG_12365 | 40S ribosomal protein S8                  | 0,086562 |
| PADG_03778 | 60S ribosomal protein L10-A               | 0,072135 |
| PADG_00514 | 60S ribosomal protein L16                 | 0,129843 |
| PADG_04588 | 60S ribosomal protein L22                 | 0,129843 |
| PADG_05939 | 60S ribosomal protein L27                 | 0,288539 |
| PADG_03781 | 60S ribosomal protein L30                 | 0,086562 |
| PADG_07834 | Ubiquitin carboxyl-terminal hydrolase     | 0,043281 |
| PADG_00607 | Riboflavin synthase                       | 0,533797 |
| PADG_06856 | Small nuclear ribonucleoprotein           | 0,072135 |
| PADG_07891 | Ubiquitin                                 | -0,24526 |
| PADG_04612 | Ribosomal protein L15                     | 0,086562 |
| PADG_02637 | E2 ubiquitin-conjugating enzyme           | 0,302966 |
| PADG_00995 | Ubiquitin-40S ribosomal protein           | -0,24526 |
| PADG_05721 | Ribos_L4_asso_C domain-containing protein | -0,1587  |

## 7. Transport routes

|                                             |                                                  |          |
|---------------------------------------------|--------------------------------------------------|----------|
| PADG_04440                                  | 14_3_3 domain-containing protein                 | -0,40395 |
| PADG_04056                                  | 14-3-3 family protein                            | -0,20198 |
| PADG_07014                                  | Vesicular-fusion protein                         | -0,14427 |
| PADG_02833                                  | ADP-ribosylation factor                          | 0,028854 |
| PADG_02017                                  | Calmodulin                                       | -0,10099 |
| PADG_06515                                  | Suaprgal                                         | -0,30297 |
| PADG_05517                                  | Rho GDP-dissociation inhibitor                   | 0,043281 |
| <b>8. Biogenesis of cellular components</b> |                                                  |          |
| PADG_03449                                  | Isopentenyl-diphosphate Delta-isomerase          | 0,129843 |
| PADG_05356                                  | Isochorismatase domain-containing protein        | 0,548224 |
| PADG_03449                                  | Isopentenyl-diphosphate Delta-isomerase          | 0,129843 |
| PADG_06165                                  | Glycolipid transferprotein HET-C2                | 0,764628 |
| <b>9. Translation</b>                       |                                                  |          |
| PADG_01949                                  | Elongation factor                                | -0,17312 |
| PADG_06265                                  | Elongation factor 1 gamma                        | -0,23083 |
| PADG_00692                                  | Elongation factor 1-alpha                        | -0,40395 |
| PADG_08125                                  | Elongation factor 2                              | -0,27411 |
| PADG_06110                                  | Translation machinery-associated protein         | -0,36067 |
| PADG_06568                                  | Translationally-controlled tumor protein homolog | -0,05771 |
| PADG_07884                                  | Polyadenylate-binding protein                    | -0,31739 |
| PADG_02896                                  | EF1_GNE domain-containing protein                | -0,14427 |
| PADG_04251                                  | Eukaryotic translation initiation                |          |
| PADG_02691                                  | Eukaryotic translation initiation                | -0,1587  |
| PADG_01558                                  | Histidine--tRNA ligase                           | -0,99546 |
| PADG_00001                                  | Peptidyl-prolyl cis-trans isomerase              | 0,057708 |
| PADG_04092                                  | Peptidyl-prolyl cis-trans isomerase              | 0,043281 |
| PADG_07953                                  | Peptidyl-prolyl cis-trans isomerase              | 0,028854 |
| PADG_12323                                  | Peptidyl-prolyl cis-trans isomerase              | -0,04328 |
| PADG_01406                                  | Phenylalanyl-tRNA synthetase beta subunit        | -0,02885 |
| <b>10. Unclassified protein</b>             |                                                  |          |
| PADG_02343                                  | Uncharacterized protein                          | -0,1587  |
| PADG_04311                                  | Uncharacterized protein                          | -0,46166 |
| PADG_04343                                  | Uncharacterized protein                          | -0,12984 |
| PADG_04446                                  | Uncharacterized protein                          |          |
| PADG_05798                                  | Uncharacterized protein                          | -0,01443 |
| PADG_00541                                  | Uncharacterized protein                          | -0,62036 |
| PADG_00608                                  | Uncharacterized protein                          | -0,41838 |
| PADG_00921                                  | Uncharacterized protein                          | -0,1587  |
| PADG_01773                                  | Uncharacterized protein                          |          |
| PADG_01796                                  | Uncharacterized protein                          |          |
| PADG_01871                                  | Uncharacterized protein                          |          |
| PADG_02764                                  | Uncharacterized protein                          | -0,08656 |
| PADG_03005                                  | Uncharacterized protein                          |          |
| PADG_03660                                  | Uncharacterized protein                          | -0,17312 |
| PADG_04439                                  | Uncharacterized protein                          | -0,04328 |
| PADG_06136                                  | Uncharacterized protein                          | -0,5338  |

---

|            |                         |          |
|------------|-------------------------|----------|
| PADG_06289 | Uncharacterized protein | -0,04328 |
| PADG_07422 | Uncharacterized protein | -0,12984 |
| PADG_07714 | Uncharacterized protein | -0,60593 |
| PADG_11062 | Uncharacterized protein | -0,30297 |
| PADG_01052 | Uncharacterized protein |          |
| PADG_00322 | Uncharacterized protein | -0,31739 |
| PADG_12447 | Uncharacterized protein | -0,04328 |
| PADG_02967 | Uncharacterized protein | -0,1587  |
| PADG_00240 | Uncharacterized protein | 0,822336 |
| PADG_01857 | Uncharacterized protein | 0,403955 |
| PADG_02092 | Uncharacterized protein | 0,100989 |
| PADG_03671 | Uncharacterized protein | 0,389528 |
| PADG_08212 | Uncharacterized protein | 0,389528 |
| PADG_08569 | Uncharacterized protein | 0,129843 |
| PADG_04869 | Uncharacterized protein | 0,14427  |

---

**Disclaimer/Publisher's Note:** The statements, opinions and data contained in all publications are solely those of the individual author(s) and contributor(s) and not of MDPI and/or the editor(s). MDPI and/or the editor(s) disclaim responsibility for any injury to people or property resulting from any ideas, methods, instructions or products referred to in the content.
